# Supplementary material for: Place of death associated with types of long-term care services near the end-of-life for home-dwelling older people in Japan: a pooled cross-sectional study
Source: Springer Nature journal article supplement (doi:10.1186/s12904-020-00622-0), 2020-08-09
Supplement: MOESM1 [file 18260644]

**Additional Table 1. Characteristics of long-term care beneficiaries aged 65 years and above who passed away in Japan between January 2008 and December 2013, by the use of each type of long-term care services provided for home-dwelling recipients**

|                                          | Total<br>(n=2035657) | No use<br>(n=1098458) | Total<br>users*<br>(n=937199) | In-home<br>services<br>(n=807785) | Day<br>services<br>(n=385573) | Short-stay<br>services<br>(n=148701) | In-home<br>services and<br>day services<br>(n=280256) | In-home<br>services and<br>short-stay<br>services<br>(n=107377) | Day<br>services<br>and short-<br>stay<br>services<br>(n=83338) | In-home,<br>day<br>service,<br>and short-<br>stay<br>service<br>(n=66111) |
|------------------------------------------|----------------------|-----------------------|-------------------------------|-----------------------------------|-------------------------------|--------------------------------------|-------------------------------------------------------|-----------------------------------------------------------------|----------------------------------------------------------------|---------------------------------------------------------------------------|
| <b>Death by year (%)</b>                 |                      |                       |                               |                                   |                               |                                      |                                                       |                                                                 |                                                                |                                                                           |
| 2008                                     | 15.6                 | 15.8                  | 15.2                          | 15.1                              | 14.8                          | 15.5                                 | 14.0                                                  | 15.5                                                            | 15.4                                                           | 14.8                                                                      |
| 2009                                     | 15.6                 | 15.8                  | 15.3                          | 15.2                              | 15.1                          | 15.7                                 | 14.7                                                  | 15.7                                                            | 15.8                                                           | 15.4                                                                      |
| 2010                                     | 16.5                 | 16.6                  | 16.3                          | 16.3                              | 16.4                          | 16.5                                 | 16.3                                                  | 16.8                                                            | 16.8                                                           | 16.9                                                                      |
| 2011                                     | 17.2                 | 17.2                  | 17.3                          | 17.3                              | 17.6                          | 17.1                                 | 17.7                                                  | 17.2                                                            | 17.4                                                           | 17.5                                                                      |
| 2012                                     | 18.3                 | 17.9                  | 18.7                          | 18.8                              | 19.0                          | 18.6                                 | 19.5                                                  | 18.6                                                            | 18.6                                                           | 18.9                                                                      |
| 2013                                     | 16.9                 | 16.7                  | 17.1                          | 17.3                              | 17.2                          | 16.5                                 | 17.8                                                  | 16.2                                                            | 16.1                                                           | 16.5                                                                      |
| <b>Place of death (%)</b>                |                      |                       |                               |                                   |                               |                                      |                                                       |                                                                 |                                                                |                                                                           |
| Home                                     | 13.9                 | 2.3                   | 27.5                          | 29.8                              | 21.1                          | 20.4                                 | 23.1                                                  | 25.2                                                            | 23.0                                                           | 25.2                                                                      |
| Other places <sup>†</sup>                | 86.1                 | 97.7                  | 72.5                          | 70.2                              | 78.9                          | 79.6                                 | 76.9                                                  | 74.8                                                            | 77.0                                                           | 74.8                                                                      |
| Median (IQR <sup>‡</sup> ) age,<br>years | 85(79, 90)           | 84(79, 90)            | 85(79, 90)                    | 85(79, 90)                        | 86(81, 91)                    | 88(79, 90)                           | 86(81, 91)                                            | 88(83, 90)                                                      | 88(83, 93)                                                     | 88(83, 93)                                                                |
| <b>Gender (%)</b>                        |                      |                       |                               |                                   |                               |                                      |                                                       |                                                                 |                                                                |                                                                           |
| Male                                     | 49.0                 | 49.8                  | 48.1                          | 48.9                              | 44.1                          | 39.4                                 | 44.7                                                  | 38.9                                                            | 38.6                                                           | 38.9                                                                      |
| Female                                   | 51.0                 | 50.2                  | 51.9                          | 51.1                              | 55.9                          | 60.6                                 | 55.3                                                  | 61.1                                                            | 61.4                                                           | 61.1                                                                      |
| <b>Degree of care need (%)</b>           |                      |                       |                               |                                   |                               |                                      |                                                       |                                                                 |                                                                |                                                                           |
| Low                                      | 8.6                  | 9.0                   | 8.2                           | 6.7                               | 9.6                           | 1.4                                  | 5.1                                                   | 0.7                                                             | 1.4                                                            | 0.6                                                                       |
| Moderate                                 | 25.9                 | 21.9                  | 30.7                          | 28.3                              | 36.1                          | 20.5                                 | 29.9                                                  | 16.3                                                            | 25.1                                                           | 18.4                                                                      |
| High                                     | 65.4                 | 69.2                  | 61.1                          | 65.1                              | 54.3                          | 78.2                                 | 65.0                                                  | 82.9                                                            | 73.5                                                           | 81.0                                                                      |
| <b>Presence of spouse (%)</b>            |                      |                       |                               |                                   |                               |                                      |                                                       |                                                                 |                                                                |                                                                           |
| Present                                  | 44.6                 | 44.4                  | 45.0                          | 46.3                              | 38.2                          | 32.9                                 | 38.8                                                  | 33.6                                                            | 31.9                                                           | 33.1                                                                      |
| Unmarried                                | 3.2                  | 3.6                   | 2.7                           | 2.8                               | 2.3                           | 2.0                                  | 2.5                                                   | 1.7                                                             | 1.6                                                            | 1.5                                                                       |
| Bereavement                              | 48.1                 | 47.6                  | 48.7                          | 47.1                              | 56.1                          | 62.7                                 | 55.2                                                  | 62.4                                                            | 64.4                                                           | 63.3                                                                      |
| Divorce                                  | 4.0                  | 4.4                   | 3.6                           | 3.8                               | 3.3                           | 2.5                                  | 3.5                                                   | 2.3                                                             | 2.1                                                            | 2.1                                                                       |
| <b>Underlying cause of death (%)</b>     |                      |                       |                               |                                   |                               |                                      |                                                       |                                                                 |                                                                |                                                                           |
| Cancer                                   | 28.0                 | 27.3                  | 28.9                          | 30.9                              | 16.9                          | 13.4                                 | 17.2                                                  | 12.7                                                            | 11.4                                                           | 11.3                                                                      |
| Cardiovascular                           | 16.3                 | 13.5                  | 19.5                          | 18.0                              | 25.5                          | 22.9                                 | 23.6                                                  | 22.2                                                            | 25.1                                                           | 23.6                                                                      |
| Pneumonia                                | 13.0                 | 15.1                  | 10.5                          | 10.2                              | 12.4                          | 15.2                                 | 12.8                                                  | 15.1                                                            | 14.7                                                           | 14.9                                                                      |
| Cerebrovascular                          | 10.9                 | 12.5                  | 9.0                           | 8.6                               | 11.7                          | 11.8                                 | 11.4                                                  | 12.1                                                            | 12.7                                                           | 12.9                                                                      |
| Senility                                 | 4.8                  | 3.6                   | 6.1                           | 6.5                               | 5.5                           | 8.7                                  | 6.4                                                   | 9.8                                                             | 8.0                                                            | 8.9                                                                       |
| Others                                   | 27.1                 | 27.9                  | 26.1                          | 25.9                              | 28.0                          | 28.0                                 | 28.6                                                  | 28.2                                                            | 28.1                                                           | 28.4                                                                      |

\* Long-term care (LTC) services were used by the recipients during/in the month of death. <sup>†</sup> Other places indicate hospitals, clinics with beds, LTC facilities, qualified nursing homes, and others such as day service facilities or outdoors <sup>‡</sup> Interquartile range.
