# Supplementary material for: Place of death associated with types of long-term care services near the end-of-life for home-dwelling older people in Japan: a pooled cross-sectional study
Source: Springer Nature journal article supplement (doi:10.1186/s12904-020-00622-0), 2020-08-09
Supplement: MOESM2 [file 18260644]

**Additional Table 2. Results for the association between the use of types of long-term care service for home-dwelling recipients and the recipients' home death, using the Poisson regression analysis with covariates\* (n= 2035657)**

|                                  | <b>IRR<sup>†</sup></b> | <b>Robust SE<sup>‡</sup></b> | <b>p-value</b> | <b>95% Confidential Interval</b> |       |
|----------------------------------|------------------------|------------------------------|----------------|----------------------------------|-------|
| <b>Age</b>                       | 1.012                  | <0.001                       | <0.001         | 1.011                            | 1.012 |
| <b>Gender</b>                    |                        |                              |                |                                  |       |
| <b>Male</b>                      |                        |                              | Reference      |                                  |       |
| <b>Female</b>                    | 1.034                  | 0.004                        | <0.001         | 1.026                            | 1.041 |
| <b>Degree of care needed</b>     |                        |                              |                |                                  |       |
| <b>Low</b>                       | 1.065                  | 0.007                        | <0.001         | 1.051                            | 1.078 |
| <b>Moderate</b>                  | 0.843                  | 0.003                        | <0.001         | 0.837                            | 0.850 |
| <b>High</b>                      |                        |                              | Reference      |                                  |       |
| <b>Presence of a spouse</b>      |                        |                              |                |                                  |       |
| <b>Present</b>                   |                        |                              | Reference      |                                  |       |
| <b>Unmarried</b>                 | 1.004                  | 0.010                        | 0.667          | 0.985                            | 1.024 |
| <b>Bereavement</b>               | 0.988                  | 0.004                        | 0.004          | 0.980                            | 0.996 |
| <b>Divorce</b>                   | 0.999                  | 0.009                        | 0.894          | 0.981                            | 1.017 |
| <b>Underlying cause of death</b> |                        |                              |                |                                  |       |
| <b>Cancer</b>                    | 1.273                  | 0.006                        | <0.001         | 1.261                            | 1.285 |
| <b>Cardiovascular</b>            | 1.853                  | 0.009                        | <0.001         | 1.835                            | 1.871 |
| <b>Pneumonia</b>                 | 0.512                  | 0.005                        | <0.001         | 0.503                            | 0.522 |
| <b>Cerebrovascular</b>           | 1.428                  | 0.009                        | <0.001         | 1.411                            | 1.446 |
| <b>Senility</b>                  | 2.599                  | 0.014                        | <0.001         | 2.572                            | 2.627 |
| <b>Others</b>                    |                        |                              | Reference      |                                  |       |
| <b>Year of death</b>             |                        |                              |                |                                  |       |
| <b>2008</b>                      |                        |                              | Reference      |                                  |       |
| <b>2009</b>                      | 0.971                  | 0.005                        | <0.001         | 0.961                            | 0.982 |
| <b>2010</b>                      | 0.953                  | 0.005                        | <0.001         | 0.943                            | 0.963 |
| <b>2011</b>                      | 0.945                  | 0.005                        | <0.001         | 0.935                            | 0.955 |
| <b>2012</b>                      | 0.959                  | 0.005                        | <0.001         | 0.949                            | 0.969 |
| <b>2013</b>                      | 0.949                  | 0.005                        | <0.001         | 0.939                            | 0.959 |

**Use of types of long-term care services for home-dwelling recipients<sup>§</sup>**

| <b>No use</b>                                                                                           |        |       | Reference |        |        |
|---------------------------------------------------------------------------------------------------------|--------|-------|-----------|--------|--------|
| <b>In-home service for care</b>                                                                         | 13.398 | 0.089 | <0.001    | 13.225 | 13.574 |
| <b>Day service for care</b>                                                                             | 6.321  | 0.066 | <0.001    | 6.193  | 6.452  |
| <b>Short stay service for care</b>                                                                      | 1.249  | 0.045 | <0.001    | 1.163  | 1.341  |
| <b>Combination use of each type of long-term care services for home-dwelling recipients<sup>§</sup></b> |        |       |           |        |        |
| <b>In-home service and day service<sup>†</sup></b>                                                      | 0.104  | 0.001 | <0.001    | 0.102  | 0.106  |
| <b>In-home service and short stay service<sup>†</sup></b>                                               | 0.526  | 0.020 | <0.001    | 0.489  | 0.566  |
| <b>Day service and short stay service<sup>†</sup></b>                                                   | 0.721  | 0.030 | <0.001    | 0.665  | 0.781  |
| <b>In-home, day, and short-stay service</b>                                                             | 2.136  | 0.091 | <0.001    | 1.965  | 2.322  |

\* Poisson regression analysis adjust for the dummy variables of secondary medical areas of care recipients' living municipality.

<sup>†</sup> Incident rate ratio.

<sup>‡</sup> Standard errors.

<sup>§</sup> The care recipients used long-term care services for home-dwelling recipients during/in the month of death. The other service type was not used.
